# Supplementary material
Source: ML conference proceedings conference paper supplement (https://proceedings.mlr.press/v37/gongb15.html)
Supplement: Supplementary file 1 [file gongb15-supp.pdf]

---

## Supplementary Document for “Discovering Temporal Causal Relations from Subsampled Data”

---

### 1. Proof of Theorem 2 in Section 3.2

*Proof.* Let us consider the limit when  $T \rightarrow \infty$ . According to (3), based on the second-order statistical information, one can uniquely determine  $\mathbf{A}^k$  and  $\mathbf{A}'^k$ , that is,

$$\mathbf{A}^k = \mathbf{A}'^k. \quad (\text{S1})$$

We can then determine the error term  $\vec{e}_t$ . Then the corresponding random vector  $\vec{e}$  follows both the representation (5) and

$$\vec{e} = \mathbf{L}' \tilde{e}', \quad (\text{S2})$$

where

$$\mathbf{L}' = [\mathbf{I} \mathbf{A}' \mathbf{A}'^2 \dots \mathbf{A}'^{k-1}], \quad (\text{S3})$$

and  $\tilde{e}' = (e_1'^{(0)}, \dots, e_n'^{(0)}, e_1'^{(1)}, \dots, e_n'^{(1)}, \dots, e_1'^{(k-1)}, \dots, e_n'^{(k-1)})^\top$  with  $e_i'^{(l)}$ ,  $l = 0, \dots, k-1$ , having the same distribution  $p_{e_i'}$ .

According to Proposition 1, each column of  $\mathbf{L}'$  is a scaled version of a column of  $\mathbf{L}$ . Denote by  $L_{ln+i}$ ,  $l = 0, \dots, k-1$ ;  $i = 1, \dots, n$ , the  $(ln+i)$ th column of  $\mathbf{L}$ , and similarly for  $L'_{ln+i}$ . According to the Uniqueness Theorem in (Eriksson & Koivunen, 2004) (which directly follows (ii) of Lemma 1), we know that under condition A2, for each  $i$ , there exists one and only one  $j$  such that the distribution of  $e_i'^{(l)}$ ,  $l = 0, \dots, k-1$  (which have the same distribution), is the same as the distribution of  $e_j'^{(l)}$ ,  $l = 0, \dots, k-1$ , up to changes of location and scale. As a consequence, the columns  $\{L'_{ln+j} \mid l = 0, \dots, k-1\}$  correspond to  $\{L_{ln+i} \mid l = 0, \dots, k-1\}$  up to the permutation and scaling arbitrariness. We now show that  $L'_{ln+j}$  corresponds to  $L_{ln+i}$  and that  $j = i$ .

According to assumption A1, all eigenvalues of  $\mathbf{A}$  have modulus smaller than one, and hence the eigenvalues of  $\mathbf{A}\mathbf{A}^\top$  are smaller than 1. Then we know that for any  $n$ -dimensional vector  $v$ ,

$$\|\mathbf{A}v\| \leq \|\mathbf{A}\| \cdot \|v\| = \sqrt{\|\mathbf{A}\mathbf{A}^\top\|} \cdot \|v\| < \|v\|.$$

According to the structure of  $\mathbf{L}$ ,  $L_{(l+1)n+i} = \mathbf{A}L_{ln+i}$ . Considering  $L_{ln+i}$  as  $v$  in the above equation, one can see  $\|L_{(l+1)n+i}\| < \|L_{ln+i}\|$ , and similarly we have  $\|L'_{(l+1)n+j}\| < \|L'_{ln+j}\|$ . Hence,  $L'_{ln+j}$  is proportional to  $L_{ln+i}$ ; more specifically, we have  $L'_{ln+j} = \lambda_{li}L_{ln+i}$ , where  $\forall l$ ,  $\lambda_{li}$  have the same absolute value but possibly different signs. In particular,  $L'_j = \lambda_{0i}L_i$ . Bearing in mind that  $L_i$  and  $L'_j$  must be columns of  $\mathbf{L}$ , as implied by the structure of  $\mathbf{L}$  and  $\mathbf{L}'$ , we can see that  $\lambda_{0i} = 1$  and that  $i = j$ . Consequently, for  $l > 0$ ,  $\lambda_{li}$  must be 1 or  $-1$ . Also considering the structures of  $\mathbf{L}$  (4) and  $\mathbf{L}'$  (S3), we see that  $\forall l > 0$ ,  $\mathbf{A}'^l = \mathbf{A}'^l \mathbf{D}_l$ , where  $\mathbf{D}_l$  are diagonal matrices with 1 or  $-1$  as their diagonal entries. If both  $\mathbf{A}'$  and  $\mathbf{A}$  have positive diagonal entries,  $\mathbf{D}$  must be the identity matrix, i.e.,  $\mathbf{A}' = \mathbf{A}$ . Therefore statement (i) is true.

We have shown that

$$L'_{ln+i} = \lambda_{li}L_{ln+i}, \quad (\text{S4})$$

where  $\lambda_{0i} = 1$  and for  $l > 0$ ,  $\lambda_{li}$  are 1 or  $-1$ . We are now ready to prove (ii). If each  $p_{e_i}$  is asymmetric,  $e_i$  and  $-e_i$  have different distributions. Consequently, the representation (S2) does not hold any more if one changes the signs of a subset of, but not all, non-zero elements of  $\{L'_{ln+j} \mid l = 0, \dots, k-1\}$ . This implies that for non-zero  $L_{ln+i}$ ,  $\lambda_{li}$ , including  $\lambda_{0i}$ , have the same sign, and they are therefore 1 since  $\lambda_{0i} = 1$ . Setting  $l = 1$  in (S4) gives  $\mathbf{A}' = \mathbf{A}$ . That is, (ii) is true.

Let us now show that (iii) holds. If  $k = 1$ , this statement trivially holds. Now consider the case where  $k > 1$ . Because of (S1), we have

$$\mathbf{A}^{k-1} \mathbf{A} = \mathbf{A}'^{k-1} \mathbf{A}'. \quad (\text{S5})$$

Since  $\mathbf{A}$  is of full rank,  $\mathbf{A}^{k-1}$  is also invertible. Recall  $\mathbf{A}'^l = \mathbf{A}'^l \mathbf{D}_l$ . Denote by  $d_{l,i}$  the  $(i, i)$ th entry of  $\mathbf{D}_l$ . Multiplying both sides of the above equation with  $\mathbf{A}^{-(k-1)}$  from the left gives  $\mathbf{A} = \mathbf{D}_{k-1} \mathbf{A} \mathbf{D}_1$ , i.e.,  $\forall i \ \& \ j$ ,  $a_{ij} = a_{ij} d_{k-1,i} d_{1,j}$ .

Thus,  $\forall i \& j$  with  $a_{ij} \neq 0$  we have  $d_{k-1,i}d_{1,j} = 1$ . Since  $a_{ii}$  are not zero, we have  $d_{k-1,i} = d_{1,i}$ . Consequently,  $a_{ij} = a_{ij}d_{1,i}d_{1,j}$ , and  $\forall i \& j$  with  $a_{ij} \neq 0$ ,  $d_{1,i}d_{1,j} = 1$ , or  $d_{1,i} = d_{1,j}$ . Furthermore, since the graph implied by  $\mathbf{A}$  is weakly connected, for any two nodes  $i'$  and  $j'$ , we know that there is a undirected path connecting them, such that  $d_{1,i'} = d_{1,j'}$ . In words,  $\mathbf{D}_1$  is either  $\mathbf{I}$  or  $-\mathbf{I}$ . Finally, if  $k > 1$  is odd,  $\mathbf{A}'^{k-1} = (\mathbf{A}\mathbf{D}_1)^{k-1} = \mathbf{A}^{k-1}$ , and then (S5) implies that  $\mathbf{A}' = \mathbf{A}$ . (iii) then holds.  $\square$

## 2. Proof of Theorem 3 in Section 3.3

*Proof.* Suppose the model of Granger causality with instantaneous effects, (2), holds, the VAR error terms of  $\tilde{\mathbf{x}}_t$  can be written as a linear transformation of  $n$  independent variables; denote by  $\mathbf{W}$  this linear transformation.

On the other hand, the error terms  $\tilde{\mathbf{e}}_t$  admit the representation (5). Since  $\mathbf{A}$  is not diagonal,  $\mathbf{L}$  contains at least  $(n+1)$  columns none of which is proportional to each other. Since all of  $e_{it}$  are non-Gaussian, Lemma 1 (i) implies that all columns in  $\mathbf{L}$  are proportional to some columns in  $\mathbf{W}$ . This implies that  $\mathbf{W}$  has at least  $(n+1)$  columns none of which is proportional to each other; however,  $\mathbf{W}$  has only  $n$  columns, resulting in a contradiction. Therefore the model of Granger causality with instantaneous effects does not hold.  $\square$

## 3. Details of the EM Algorithm in Section 4.1

Instead of directly maximizing the data log-likelihood  $\sum_t \ln p(\tilde{\mathbf{x}}_t | \tilde{\mathbf{x}}_{t-1}, \Theta)$ , the EM algorithm maximizes the lower bound of the data log-likelihood, i.e.,

$$\mathcal{L}(q, \Theta) = \sum_t \sum_{\mathbf{z}_t} \int q(\mathbf{z}_t, \tilde{\mathbf{e}}_t) \ln \frac{p(\tilde{\mathbf{x}}_t, \tilde{\mathbf{e}}_t, \mathbf{z}_t | \tilde{\mathbf{x}}_{t-1}, \Theta)}{q(\mathbf{z}_t, \tilde{\mathbf{e}}_t)} d\tilde{\mathbf{e}}_t, \quad (\text{S6})$$

with respect to the distribution  $q(\mathbf{z}_t, \tilde{\mathbf{e}}_t)$  and the parameters  $\Theta$  alternately until convergence.

**E step** In the E step, given the parameters  $\Theta'$  from the previous M step, the lower bound is maximized with respect to  $q(\mathbf{z}_t, \tilde{\mathbf{e}}_t)$ . The maximum lower bound is obtained when  $q(\mathbf{z}_t, \tilde{\mathbf{e}}_t | \Theta')$  equals the posterior distribution  $p(\mathbf{z}_t | \tilde{\mathbf{x}}_t, \tilde{\mathbf{x}}_{t-1}, \Theta') p(\tilde{\mathbf{e}}_t | \mathbf{z}_t, \tilde{\mathbf{x}}_t, \tilde{\mathbf{x}}_{t-1}, \Theta')$ . The posterior distribution is obtained as

$$p(\mathbf{z}_t | \tilde{\mathbf{x}}_t, \tilde{\mathbf{x}}_{t-1}, \Theta') = \frac{p(\tilde{\mathbf{x}}_t | \tilde{\mathbf{x}}_{t-1}, \mathbf{z}_t) p(\mathbf{z}_t)}{\sum_{\mathbf{z}'_t} p(\tilde{\mathbf{x}}_t | \tilde{\mathbf{x}}_{t-1}, \mathbf{z}'_t) p(\mathbf{z}'_t)}, \quad (\text{S7})$$

$$\begin{aligned} p(\tilde{\mathbf{e}}_t | \mathbf{z}_t, \tilde{\mathbf{x}}_t, \tilde{\mathbf{x}}_{t-1}, \Theta') &= \mathcal{N}(\tilde{\mathbf{e}}_t | \tilde{\boldsymbol{\mu}}_{\mathbf{z}_t} + \tilde{\boldsymbol{\Sigma}}_{\mathbf{z}_t}^T \mathbf{L}^T (\mathbf{L} \tilde{\boldsymbol{\Sigma}}_{\mathbf{z}_t} \mathbf{L}^T + \Lambda)^{-1} \\ &\quad (\tilde{\mathbf{x}}_t - \mathbf{A}^k \tilde{\mathbf{x}}_{t-1} - \mathbf{L} \tilde{\boldsymbol{\mu}}_{\mathbf{z}_t}), \tilde{\boldsymbol{\Sigma}}_{\mathbf{z}_t} - \tilde{\boldsymbol{\Sigma}}_{\mathbf{z}_t}^T \\ &\quad \mathbf{L}^T (\mathbf{L} \tilde{\boldsymbol{\Sigma}}_{\mathbf{z}_t} \mathbf{L}^T + \Lambda)^{-1} \mathbf{L} \tilde{\boldsymbol{\Sigma}}_{\mathbf{z}_t}), \end{aligned} \quad (\text{S8})$$

where  $\tilde{\boldsymbol{\mu}}_{\mathbf{z}_t} = (\tilde{\mu}_{1,z_{t,1}}, \dots, \tilde{\mu}_{nk,z_{t,nk}})^T$  and  $\tilde{\boldsymbol{\Sigma}}_{\mathbf{z}_t} = \text{diag}(\tilde{\sigma}_{1,z_{t,1}}^2, \dots, \tilde{\sigma}_{nk,z_{t,nk}}^2)$ .

**M step** In the M step, given the posterior distributions (S7) (S8) from the E step, the parameters are updated by maximizing the lower bound with respect to  $\Theta$ . The lower bound can be decompsed into four terms each of which only contains a subset of the parameters, i.e.,

$$\mathcal{L}(q, \Theta) = \mathcal{L}_1(q, w) + \mathcal{L}_2(q, \mu, \sigma) + \mathcal{L}_3(q, \mathbf{A}) + \mathcal{L}_4(q). \quad (\text{S9})$$

The four terms are calculated as

$$\mathcal{L}_1 = \sum_t \sum_{i=1}^{nk} \sum_{z_{t,i}=1}^m p(z_{t,i} | \tilde{\mathbf{x}}_t, \tilde{\mathbf{x}}_{t-1}, \Theta') \ln p(z_{t,i}) = \sum_t \sum_{i=1}^{nk} \sum_{z_{t,i}=1}^p p(z_{t,i} | \tilde{\mathbf{x}}_t, \tilde{\mathbf{x}}_{t-1}, \Theta') \ln \tilde{w}_{i,z_{t,i}}, \quad (\text{S10})$$

$$\begin{aligned} \mathcal{L}_2 &= \sum_t \sum_{i=1}^{nk} \sum_{z_{t,i}=1}^m \int p(\tilde{\mathbf{e}}_{t,i}, z_{t,i} | \tilde{\mathbf{x}}_t, \tilde{\mathbf{x}}_{t-1}, \Theta') \ln p(\tilde{\mathbf{e}}_{t,i} | z_{t,i}) d\tilde{\mathbf{e}}_{t,i} \\ &= -\frac{1}{2} \sum_t \sum_{i=1}^{nk} \sum_{z_{t,i}=1}^m \int p(\tilde{\mathbf{e}}_{t,i}, z_{t,i} | \tilde{\mathbf{x}}_t, \tilde{\mathbf{x}}_{t-1}, \Theta') \left( \frac{(\tilde{\mathbf{e}}_{t,i} - \tilde{\boldsymbol{\mu}}_{i,z_{t,i}})^2}{\tilde{\sigma}_{i,z_{t,i}}^2} + \ln 2\pi + 2 \ln \tilde{\sigma}_{i,z_{t,i}} \right) d\tilde{\mathbf{e}}_{t,i}, \end{aligned} \quad (\text{S11})$$

$$\begin{aligned}
 \mathcal{L}_3 &= \sum_t \int p(\tilde{\mathbf{e}}_t | \tilde{\mathbf{x}}_t, \tilde{\mathbf{x}}_{t-1}, \Theta') \ln p(\tilde{\mathbf{x}}_t | \tilde{\mathbf{x}}_{t-1}, \tilde{\mathbf{e}}_t) d\tilde{\mathbf{e}}_t, \\
 &= -\frac{1}{2} \sum_t \left\{ [(\tilde{\mathbf{x}}_t - \mathbf{A}^k \tilde{\mathbf{x}}_{t-1})^\top \Lambda^{-1} (\tilde{\mathbf{x}}_t - \mathbf{A}^k \tilde{\mathbf{x}}_{t-1})] - 2(\tilde{\mathbf{x}}_t - \mathbf{A}^k \tilde{\mathbf{x}}_{t-1})^\top \Lambda^{-1} \mathbf{L} \langle \tilde{\mathbf{e}}_t \rangle_{p(\tilde{\mathbf{e}}_t | \tilde{\mathbf{x}}_t, \tilde{\mathbf{x}}_{t-1}, \Theta')} \right. \\
 &\quad \left. + Tr \left( \mathbf{L}^\top \Lambda^{-1} \mathbf{L} \langle \tilde{\mathbf{e}}_t \tilde{\mathbf{e}}_t^\top \rangle_{p(\tilde{\mathbf{e}}_t | \tilde{\mathbf{x}}_t, \tilde{\mathbf{x}}_{t-1}, \Theta')} \right) + \ln |\Lambda| + n \ln 2\pi \right\}, \tag{S12}
 \end{aligned}$$

$$\mathcal{L}_4 = - \sum_t \sum_{\mathbf{z}_t} \int p(\mathbf{z}_t, \tilde{\mathbf{e}}_t | \tilde{\mathbf{x}}_t, \tilde{\mathbf{x}}_{t-1}, \Theta') \ln p(\mathbf{z}_t, \tilde{\mathbf{e}}_t | \tilde{\mathbf{x}}_t, \tilde{\mathbf{x}}_{t-1}, \Theta') d\tilde{\mathbf{e}}_t, \tag{S13}$$

where  $\langle f(e) \rangle_{p(e)} = \int p(e) f(e) de$ .

Due to the zero mean constraints on the noises,  $\mu_{i,c}$  and  $w_{i,c}$  are updated by maximize  $\mathcal{L}_1 + \mathcal{L}_2$  with the constraints  $\sum_{c=1}^m w_{i,c} = 1, \sum_{c=1}^m w_{i,c} \mu_{i,c} = 0, i = 1, \dots, n$ . This is a constrained nonlinear programming problem and we solve it using interior point methods.

After updating  $\mu_{i,c}$  and  $w_{i,c}$ ,  $\sigma$  can be updated by maximizing  $\mathcal{L}_2$ , which gives

$$\sigma_{i,c}^2 = \frac{\sum_t \sum_{j=1}^k \left\langle \tilde{e}_{t,i+n(j-1)}^2 - 2\mu_{i,c} \tilde{e}_{t,i+n(j-1)} \right\rangle_{p(\tilde{e}_{t,i+n(j-1)}, z_{t,i+n(j-1)} = c | \mathbf{x}_t, \mathbf{x}_{t-1})}}{\sum_t \sum_{j=1}^k p(z_{t,i+n(j-1)} = c | \mathbf{x}_t, \mathbf{x}_{t-1})} + \mu_{i,c}^2, \tag{S14}$$

Since there is no analytic solution to  $\mathbf{A}$ , we update  $\mathbf{A}$  using conjugate gradient descent algorithm. The gradient of  $\mathcal{L}_3$  with respect to  $\mathbf{A}$  is given by

$$\begin{aligned}
 \frac{\partial \mathcal{L}(\mathbf{A})}{\partial \mathbf{A}_{ij}} &= -\frac{1}{2} \sum_t \left\{ Tr \left[ -2(\Lambda^{-1} (\tilde{\mathbf{x}}_t - \mathbf{A}^k \tilde{\mathbf{x}}_{t-1}) \tilde{\mathbf{x}}_{t-1}^\top)^\top \sum_{r=0}^{k-1} \mathbf{A}^r \mathbf{J}^{ij} \mathbf{A}^{k-1-r} \right] \right. \\
 &\quad - 2 \left\{ Tr \left[ -(\Lambda^{-1} \mathbf{L} \langle \tilde{\mathbf{e}}_t \rangle \mathbf{x}_t^\top)^\top \sum_{r=0}^{k-1} \mathbf{A}^r \mathbf{J}^{ij} \mathbf{A}^{k-1-r} \right] \right. \\
 &\quad \left. \left. + \sum_{l=1}^{k-1} Tr \left[ (\Lambda^{-1} (\tilde{\mathbf{x}}_t - \mathbf{A}^k \tilde{\mathbf{x}}_{t-1}) \langle \tilde{\mathbf{e}}_{t,l}^\top \rangle)^\top \sum_{r=0}^{l-1} \mathbf{A}^r \mathbf{J}^{ij} \mathbf{A}^{l-1-r} \right] \right\} \right. \\
 &\quad \left. + Tr \left( \langle \tilde{\mathbf{e}}_t \tilde{\mathbf{e}}_t^\top \rangle \frac{\partial U}{\partial \mathbf{A}_{ij}} \right) \right\}, \tag{S15}
 \end{aligned}$$

where  $U = \mathbf{L}^\top \Lambda^{-1} \mathbf{L}$  and  $\mathbf{J}^{ij}$  is a matrix whose  $ij$ -th element is 1 and all the other elements are 0.  $U$  is composed of  $k * k$  blocks of  $n * n$  matrices. Each sub-matrix is  $U_{mn} = (\mathbf{A}^m)^\top \Lambda^{-1} \mathbf{A}^n, m = 0, \dots, k-1, n = 0, \dots, k-1$ . The gradient of each sub-matrix  $U_{mn}$  is

$$\begin{aligned}
 \frac{\partial (U_{mn})_{kl}}{\partial \mathbf{A}_{ij}} &= Tr \left[ \left( mat_{i'j'} \frac{\partial ((\mathbf{A}^m)^\top \Lambda^{-1} \mathbf{A}^n)_{kl}}{\partial \mathbf{A}_{i'j'}} \right)^\top \frac{\partial \mathbf{A}^m}{\partial \mathbf{A}_{ij}} \right] \\
 &\quad + Tr \left[ \left( mat_{i'j'} \frac{\partial ((\mathbf{A}^m)^\top \Lambda^{-1} \mathbf{A}^n)_{kl}}{\partial \mathbf{A}_{i'j'}} \right)^\top \frac{\partial \mathbf{A}^n}{\partial \mathbf{A}_{ij}} \right] \\
 &= Tr \left[ \left( mat_{i'j'} (\delta_{kj'} (\Lambda^{-1} \mathbf{A}^n)_{i'l}) \right)^\top \sum_{r=0}^{m-1} \mathbf{A}^r \mathbf{J}^{ij} \mathbf{A}^{m-1-r} \right] \\
 &\quad + Tr \left[ \left( mat_{i'j'} (\delta_{lj'} ((\mathbf{A}^m)^\top \Lambda^{-1})_{ki'}) \right)^\top \sum_{r=0}^{n-1} \mathbf{A}^r \mathbf{J}^{ij} \mathbf{A}^{n-1-r} \right], \tag{S16}
 \end{aligned}$$

where  $mat_{i'j'} f(i', j')$  is a matrix whose  $i' j'$ -th element is  $f(i', j')$ .

## References

Eriksson, J. and Koivunen, V. Identifiability, separability, and uniqueness of linear ICA models. *IEEE Signal Processing Letters*, 11(7):601–604, 2004.
